# Supplementary material
Source: PubMed Central journal article supplement (PMC4692196)

Supplementary Figure 1. PRISMA Flow Chart

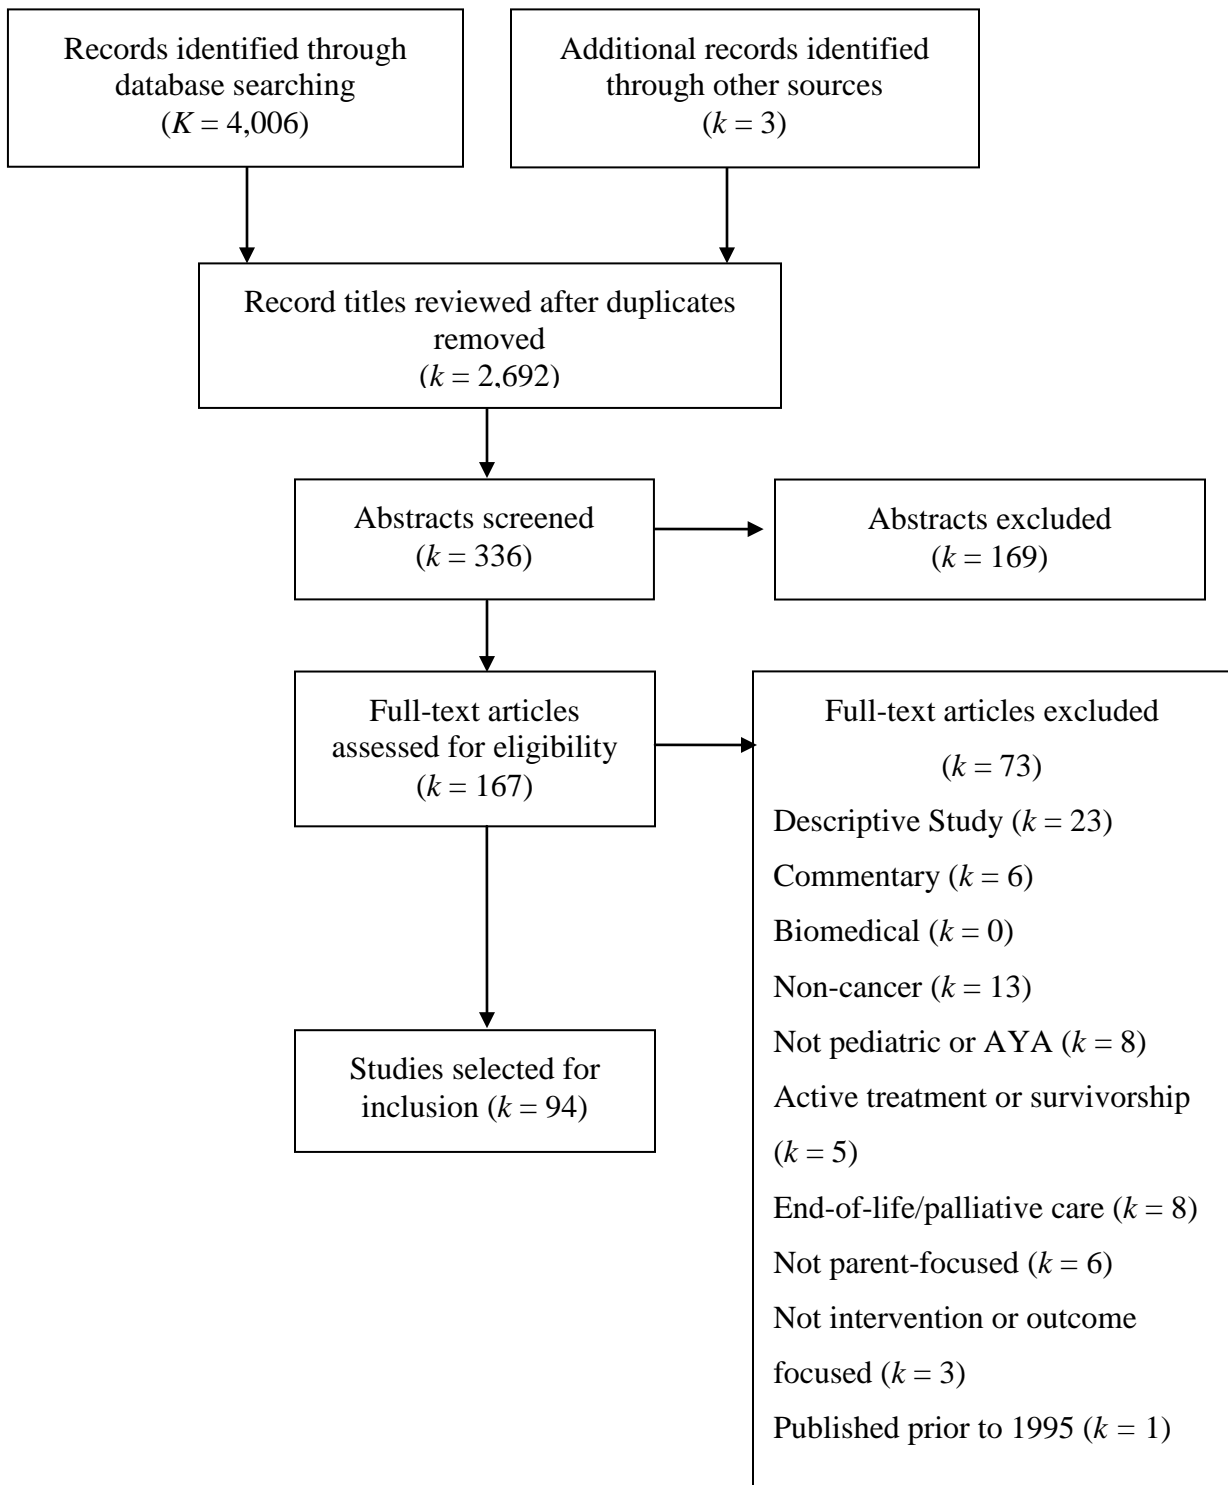

Supplement: NIHMS739282-supplement-Supp_Fig_S1.pdf [file NIHMS739282-supplement-Supp_Fig_S1.pdf]
